# Supplementary material for: A three-quantile bias correction with spatial transfer for the correction of simulated European river runoff to force ocean models
Source: Copernicus journal article supplement (doi:10.5194/os-20-1457-2024), 2024-11-12
Supplement: Supplementary file 1 [file os-20-1457-2024-supplement.pdf]

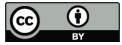

*Supplement of*

## **A three-quantile bias correction with spatial transfer for the correction of simulated European river runoff to force ocean models**

**Stefan Hagemann et al.**

*Correspondence to:* Stefan Hagemann ([stefan.hagemann@hereon.de](mailto:stefan.hagemann@hereon.de))

The copyright of individual parts of the supplement might differ from the article licence.

959 **Supplementary Material**

960 **Table S1:** Various metrics (see Sect. 2.7) of the simulated salinity time series in 6 m  
 961 depth compared with the SSS data of Droghei et al. (2018) at the locations of the  
 962 stations *Deutsche Bucht* and *EMS* for 2011-2018 and at *Deutsche Bucht* for 2013.

| <b>Metric</b>         | <b>2011-2018</b>      |               |            |               | <b>2013</b>           |               |
|-----------------------|-----------------------|---------------|------------|---------------|-----------------------|---------------|
|                       | <i>Deutsche Bucht</i> |               | <i>EMS</i> |               | <i>Deutsche Bucht</i> |               |
|                       | <b>HDW</b>            | <b>HDW-BC</b> | <b>HDW</b> | <b>HDW-BC</b> | <b>HDW</b>            | <b>HDW-BC</b> |
| Bias [%]              | -3                    | -2.2          | -1.1       | -0.7          | -3.9                  | -2.6          |
| Variability ratio [%] | 135.5                 | 117.1         | 130.4      | 116.7         | 132.7                 | 116.2         |
| Normalized RMSE [%]   | 23.2                  | 18.7          | 25.6       | 22.9          | 50.8                  | 36.9          |
| Centered RMSE         | 1.01                  | 0.89          | 0.91       | 0.84          | 0.78                  | 0.70          |
| Correlation           | 0.14                  | 0.21          | 0.25       | 0.26          | 0.16                  | 0.22          |

963

964

965

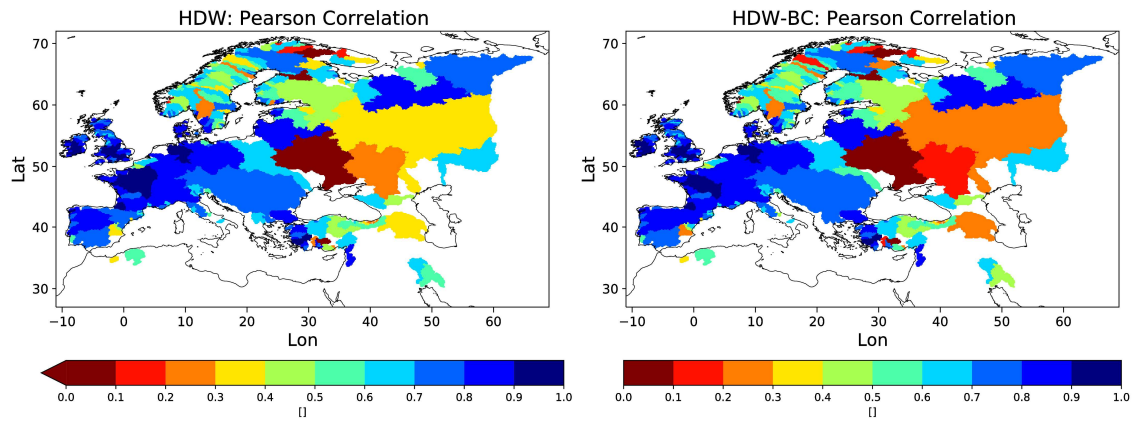

966  
967

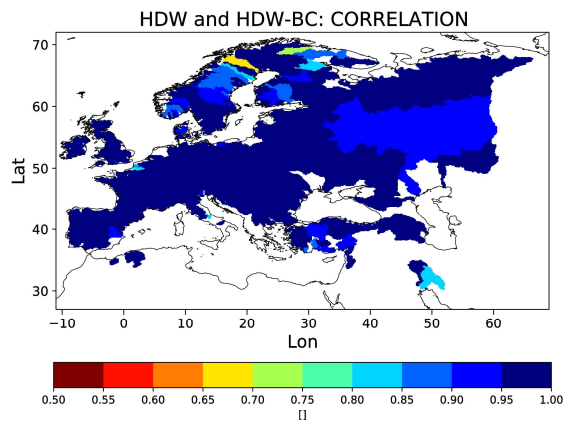

968

969  
970

**Figure S1:** Correlation of a) HDW and b) HDW-BC with observations as well as c) HDW with HDW-BC from 1979-2014.

971

972

973

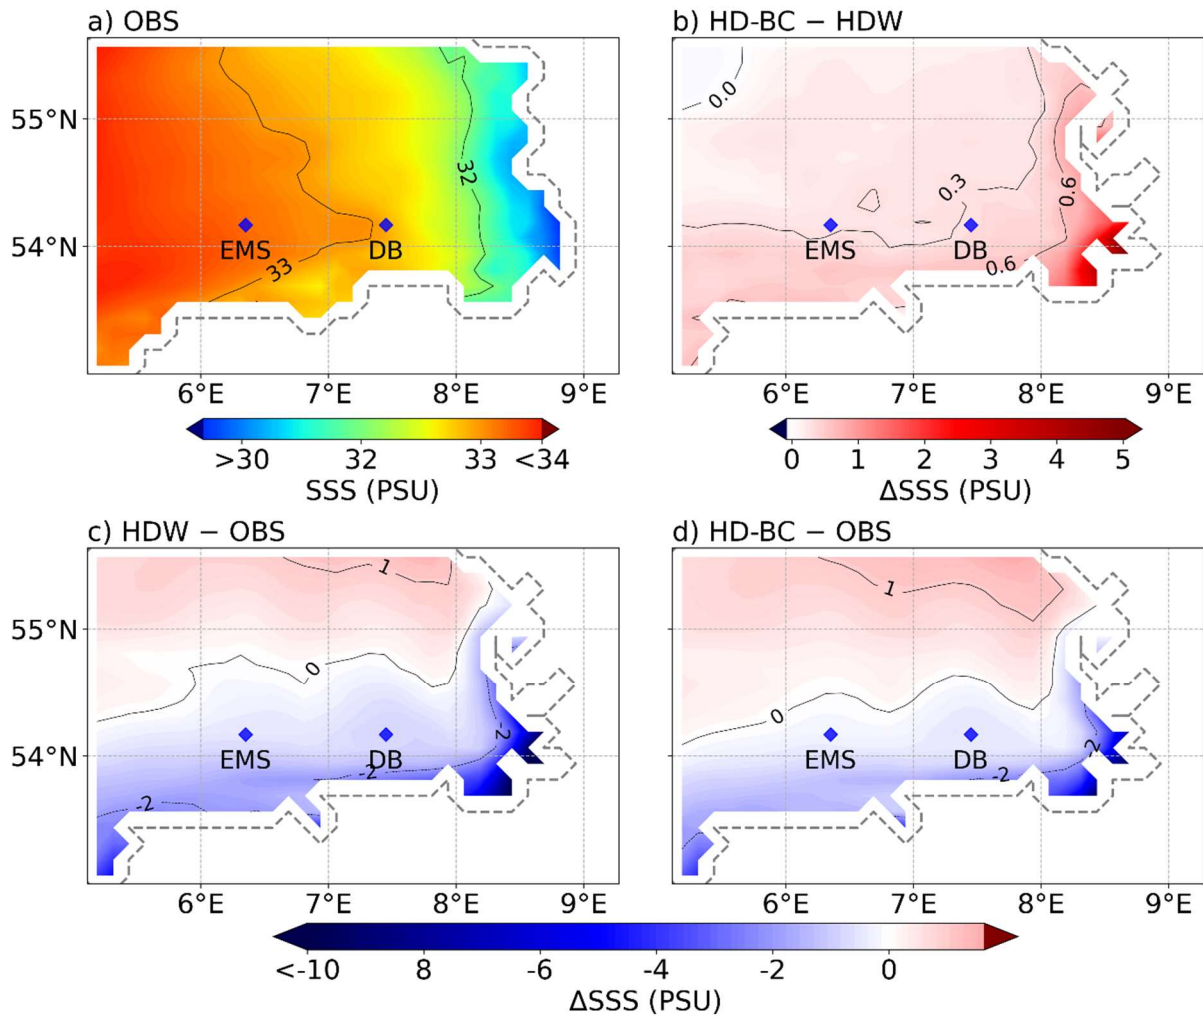

974

975 **Figure S2.** Same as Figure 13, but with SSS averages calculated over the period June 2013.

976

977
